# Supplementary material for: BiomeNet: A Bayesian Model for Inference of Metabolic Divergence among Microbial Communities
Source: PLOS journal article supplement (doi:10.1371/journal.pcbi.1003918), 2014-11-20
Supplement: S10 (10.1371/journal.pcbi.1003918.s010) [file journal.pcbi.1003918.s010]

**Table S1. Principal reactions of subnetwork 49 inferred from the mammalian dataset.**

| Reaction No. | Reactant Numbers                                                                                    | Pathway                                                                        |
|--------------|-----------------------------------------------------------------------------------------------------|--------------------------------------------------------------------------------|
| R00811       | <a href="#">C00089</a> + <a href="#">C04261</a> <=> <a href="#">C16688</a> + <a href="#">C00615</a> | Starch and sucrose metabolism                                                  |
| R02630       | <a href="#">C04261</a> + <a href="#">C00159</a> <=> <a href="#">C00615</a> + <a href="#">C00275</a> | Fructose and mannose metabolism<br>Amino sugar and nucleotide sugar metabolism |
| R02631       | <a href="#">C04261</a> + <a href="#">C00329</a> <=> <a href="#">C00615</a> + <a href="#">C00352</a> | Amino sugar and nucleotide sugar metabolism                                    |
| R02704       | <a href="#">C04261</a> + <a href="#">C00392</a> <=> <a href="#">C00615</a> + <a href="#">C00644</a> | Fructose and mannose metabolism                                                |
| R02738       | <a href="#">C04261</a> + <a href="#">C00031</a> <=> <a href="#">C00615</a> + <a href="#">C00668</a> | Glycolysis / Gluconeogenesis<br>Amino sugar and nucleotide sugar metabolism    |
| R02780       | <a href="#">C01083</a> + <a href="#">C04261</a> <=> <a href="#">C00689</a> + <a href="#">C00615</a> | Starch and sucrose metabolism                                                  |
| R03076       | <a href="#">C04261</a> + <a href="#">C11477</a> <=> <a href="#">C00615</a> + <a href="#">C00934</a> | general reaction                                                               |
| R03232       | <a href="#">C04261</a> + <a href="#">C00095</a> <=> <a href="#">C00615</a> + <a href="#">C01094</a> | Fructose and mannose metabolism                                                |
| R04076       | <a href="#">C04261</a> + <a href="#">C00247</a> <=> <a href="#">C00615</a> + <a href="#">C02888</a> | Fructose and mannose metabolism                                                |
| R04111       | <a href="#">C04261</a> + <a href="#">C00208</a> <=> <a href="#">C00615</a> + <a href="#">C02995</a> | Starch and sucrose metabolism                                                  |
| R04393       | <a href="#">C04261</a> + <a href="#">C00243</a> <=> <a href="#">C00615</a> + <a href="#">C05396</a> | Galactose metabolism                                                           |
| R04394       | <a href="#">C04261</a> + <a href="#">C01451</a> <=> <a href="#">C00615</a> + <a href="#">C06188</a> | Glycolysis / Gluconeogenesis                                                   |
| R05132       | <a href="#">C04261</a> + <a href="#">C06186</a> <=> <a href="#">C00615</a> + <a href="#">C06187</a> | Glycolysis / Gluconeogenesis                                                   |
| R05199       | <a href="#">C04261</a> + <a href="#">C00140</a> <=> <a href="#">C00615</a> + <a href="#">C00357</a> | Amino sugar and nucleotide sugar metabolism                                    |
| R05570       | <a href="#">C01697</a> + <a href="#">C04261</a> <=> <a href="#">C06311</a> + <a href="#">C00615</a> | Galactose metabolism                                                           |
| R05820       | <a href="#">C04261</a> + <a href="#">C00794</a> <=> <a href="#">C00615</a> + <a href="#">C01096</a> | Fructose and mannose metabolism                                                |
| R07671       | <a href="#">C04261</a> + <a href="#">C00072</a> <=> <a href="#">C00615</a> + <a href="#">C16186</a> | Ascorbate and aldarate metabolism                                              |
| R08367       | <a href="#">C02262</a> + <a href="#">C04261</a> <=> <a href="#">C06377</a> + <a href="#">C00615</a> | Galactose metabolism                                                           |
| R08559       | <a href="#">C02713</a> + <a href="#">C04261</a> <=> <a href="#">C16698</a> + <a href="#">C00615</a> | Amino sugar and nucleotide sugar metabolism                                    |
| R08860       | <a href="#">C04261</a> + <a href="#">C01019</a> <=> <a href="#">C00615</a> + <a href="#">C02985</a> | Amino sugar and nucleotide sugar metabolism                                    |
| R02628       | <a href="#">C00074</a> + <a href="#">C00615</a> <=> <a href="#">C00022</a> + <a href="#">C04261</a> | enzyme I of the phosphotransferase system                                      |
| R03921       | <a href="#">C16688</a> + <a href="#">C00001</a> <=> <a href="#">C02336</a> + <a href="#">C00668</a> | Starch and sucrose metabolism                                                  |
| R08555       | <a href="#">C00256</a> + <a href="#">C00357</a> <=> <a href="#">C16698</a> + <a href="#">C00001</a> | Amino sugar and nucleotide sugar metabolism                                    |
| R07677       | <a href="#">C16186</a> + <a href="#">C00001</a> <=> <a href="#">C14899</a>                          | Ascorbate and aldarate metabolism                                              |
| R02087       | <a href="#">C00357</a> <=> <a href="#">C04257</a>                                                   | Amino sugar and nucleotide sugar metabolism                                    |
